# Supplementary material
Source: Springer Nature journal article supplement (https://www.springermedizin.de/resource/supplementary/12943_2010_597_MOESM4_ESM.pdf/9555074)

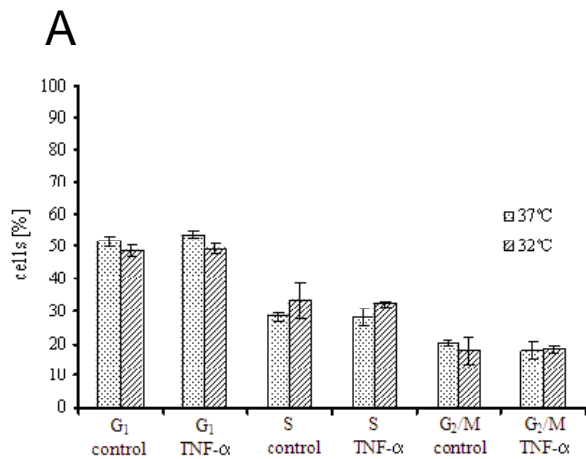

### B

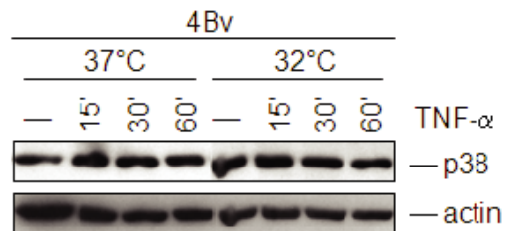

### C

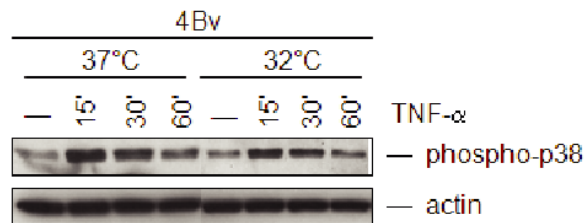

Supplement: MOESM4 [file 9555074]
